# Supplementary material
Source: PubMed Central journal article supplement (PMC9393065)
Supplement: web_material_kwac026.pdf [file web_material_kwac026.pdf]

## **Web Material**

Measurement error affecting web- and paper-based dietary assessment instruments: Insights from the  
Multi-Cohort Eating and Activity Study for Understanding Reporting Error

Sharon I. Kirkpatrick, Richard P. Troiano, Brian Barrett, Christopher Cunningham, Amy F. Subar, Yikyung  
Park, Heather R. Bowles, Laurence S. Freedman, Victor Kipnis, Eric B. Rimm, Walter C. Willett, Nancy  
Potischman, Donna Spiegelman, David J. Baer, Dale A. Schoeller, Kevin W. Dodd

### **CONTENTS**

Web Appendix 1: Overview of Number of Replicate Measures and Excluded Observations

Web Appendix 2: Measurement Error Modelling

Web Tables 1–11

## Web Appendix 1: Overview of Number of Replicate Measures and Excluded Observations

Web Tables 1-4 illustrate, by nutrient-instrument combination, how many non-excluded participants, participants with multiple administrations of data, and non-excluded observations were included in the analysis. The tables additionally show how many participants and observations were excluded for each combination. There is one table for each study, with IDATA stratified by gender.

Observations were excluded on a nutrient-by-nutrient basis for each instrument and study. Excluded observations were identified on the basis of single observations that were more than 2.5 times the interquartile range away from the 25<sup>th</sup> or 75<sup>th</sup> percentile, or on the basis of individuals whose contrasts were more than 2.5 times the interquartile range away from the 25<sup>th</sup> or 75<sup>th</sup> percentile of contrasts. The percentiles were drawn from the first administration since there was no consistent pattern of drift across administration. A threshold of 2.5 times the IQR was used as opposed to 2 in earlier validation studies to be conservative in terms of excluding data points and individuals.

If an individual had two measurements available, say  $X_1$  and  $X_2$ , there is only one contrast:  $(X_2 - X_1) / \sqrt{2}$ . This contrast estimates the difference in random measurement errors and, under typical model assumptions, has variance equal to the measurement error variance because of the standardizing factor  $\sqrt{2}$  (the square root of the sum of squared contrast coefficients). For ASA24, up to six measures were available and there are up to five orthogonal polynomial contrasts. These contrasts, when standardized, are uncorrelated and thus independent under the assumption of normal error with the same common variance. The second stage of outlier classification based on contrasts stabilized the estimation of the random error variance that is crucial to estimating the measurement error structure.

Individuals identified as extreme based on contrasts were classified as influential and their measurements for a given nutrient/instrument combination excluded.

## Web Appendix 2: Measurement Error Modelling<sup>1</sup>

In the covariate-included models, the log of the  $j$ -th biomarker measurement for individual  $i$  is expressed as a linear function of age ( $A_i$ ), logged BMI ( $B_i$ ), and two additional random terms representing i) person-specific deviations of  $\log(T_i)$  from the linear function of  $A$  and  $B$ , and ii) random measurement error:

$$\log(M_{ij}) = \beta_{oT} + \beta_{AT}A_i + \beta_{BT}\log(B_i) + u_{Ti} + \varepsilon_{Tij},$$

where the last two terms are normally distributed random variables with mean zero and variances  $\sigma_{uT}^2$  and  $\sigma_{\varepsilon T}^2$ . This model follows from the assumption that the biomarker is a true reference measure, because (writing the definition of  $u_{Ti}$  explicitly)

$$\begin{aligned} \log(M_{ij}) &= \beta_{oT} + \beta_{AT}A_i + \beta_{BT}\log(B_i) + [\log(T_i) - (\beta_{oT} + \beta_{AT}A_i + \beta_{BT}\log(B_i))] + \varepsilon_{Tij} \\ &= \log(T_i) + \varepsilon_{Tij} \end{aligned}$$

In a risk model where  $T$  is the primary exposure and  $A$  and  $B$  are confounders, the contribution of  $T$  independent of  $A$  and  $B$  is of interest, information which is carried by  $u_{Ti}$ . The measurement error models for the self-report instruments therefore focus on how well the instrument captures  $u_{Ti}$ . Specifically, the log of the  $j$ -th reported intake for individual  $i$  is expressed as a linear function of  $u_{Ti}$ , age, and logged BMI, with two additional random terms representing i) person-specific bias and ii) random error:

$$\log(Q_{ij}) = \beta_{oQ} + \beta_{TQ}u_{Ti} + \beta_{AQ}A_i + \beta_{BQ}\log(B_i) + u_{Qi} + \varepsilon_{Qij},$$

where the last two terms are normally distributed random variables with mean zero and variances  $\sigma_{uQ}^2$  and  $\sigma_{\varepsilon Q}^2$ . Here, the subscript  $Q$  indicates that the equation holds for FFQ-reported intake. Similar expressions are assumed for intakes derived from ASA24 recalls (subscripted by  $R$ ) and food records ( $D$ ). This formulation retains terms analogous to those of the standard Kipnis et al.<sup>1</sup> measurement error model. It also adds two systematic bias terms corresponding to age and logged BMI.

In typical regression analysis of diet-health relationships using error-prone measurements instead of true intakes, bias in the regression coefficient for dietary intake is introduced because the exposure axis is distorted while the response axis is unchanged. Under our model, the total variation in, for example, transformed reported FFQ intake (conditional on age and BMI) is comprised of a flattened slope term  $\beta_{TQ}^2 \text{Var}(\log(T)|A, B)$ , a person specific bias term  $\sigma_{uQ}^2$ , and a random error term  $\sigma_{\varepsilon Q}^2$ . If the error-prone exposures have smaller variance than true exposure (for example, if the dominant factor is the flattened slope, with a coefficient less than 1), then the estimated regression line is steeper than it should be, i.e., exaggerated. The reverse (attenuation) occurs when the error-prone exposures have larger variance than true exposure, which can occur if the flattened slope has a coefficient greater than 1 or if the effects of person-specific bias and/or random error are present. If the sum of the three terms exactly reproduces  $\text{Var}(\log(T)|A, B)$ , then the regression using self-reported intake will be unbiased for the true relationship. In practice, the net effect of the three terms produces substantial attenuation.

The extent of the attenuation is quantified by the *attenuation factor*, defined as the slope in the regression of true intake on reported intake, which can be estimated from the model parameters, e.g.

$$\lambda_Q = \frac{\text{Cov}(T, Q|A, B)}{\text{Var}(Q|A, B)} = \frac{\beta_{TQ}\sigma_{uT}^2}{\beta_{TQ}^2\sigma_{uT}^2 + \sigma_{uQ}^2 + \sigma_{\varepsilon Q}^2}.$$

The attenuation factor represents the multiplicative bias in the estimated regression coefficient when a health outcome is regressed on self-reported rather than true intake. Similarly, the correlation between log reported FFQ intake and log true intake is expressed as

$$\rho_{QT} = \frac{\text{Cov}(T, Q|A, B)}{\sqrt{\text{Var}(T|A, B)\text{Var}(Q|A, B)}} = \frac{\beta_{TQ}\sigma_{uT}}{\sqrt{\beta_{TQ}^2\sigma_{uT}^2 + \sigma_{uQ}^2 + \sigma_{\varepsilon Q}^2}}$$

The correlation between reported and true intake is important because it relates to the loss of power to detect a relationship between intake and health induced by measurement error. The formulas above hold for a single administration of the self-report instrument. If one uses the average of  $k$  measurements, rather than just one, the attenuation and correlation factors above hold, with  $\sigma_{\varepsilon Q}^2$  replaced with  $k^{-1}\sigma_{\varepsilon Q}^2$ .

Note that the formulae for the attenuation factors and correlation coefficients do not involve the constant bias terms for age and BMI that are in the measurement error models above, nor do they involve the coefficients for age and BMI in the model for true intake. This reflects the fact that when the goal is to consider true intake conditional on age and BMI (as is often the case in a diet-disease model), then the systematic differences in the measurement error structure due to these covariates are constant and therefore can be ignored in the calculation of attenuation factors and correlation coefficients.

Furthermore, it can be shown that constant systematic biases, such as those considered in the model, can induce correlations between the personal characteristics and within-person differences between biomarker and self-report instruments. In other words, this model does not reflect the most complex model possible to account for differences in measurement error structure due to personal characteristics, but it does have features that could conceivably explain relationships between reporting errors and personal characteristics.

If a reference biomarker is available on at least some individuals in the study, techniques such as regression calibration can be used to fully adjust for the biasing effects of random and systematic measurement error. In the full-adjustment case, the expected attenuation factor is 1, but the power loss is equivalent to that expected when the within-person average of the self-report data is used as the exposure in the health risk model. Without a reference biomarker, full adjustment for the effects of measurement error is not possible. However, a partial adjustment, for only the within-person random error, can be performed using the same adjustment techniques assuming that the self-report is itself a reference measure, and enough repeat administrations are available. In the partial-adjustment case, the expected attenuation factor is given by the corresponding formula with  $\sigma_{\varepsilon Q}^2$  omitted entirely.

## Web Tables 1-11

Web Table 1: IDATA Men excluded observations

| Nutrient               | Measurement | Total eligible individuals | Eligible individuals w/ 2+ admins | Total eligible observations | Excluded individuals | Excluded individuals w/ 2+ admins | Excluded observations |
|------------------------|-------------|----------------------------|-----------------------------------|-----------------------------|----------------------|-----------------------------------|-----------------------|
| Energy                 | Biospecimen | 347                        | 14                                | 361                         | 0                    | 0                                 | 0                     |
|                        | FFQ         | 490                        | 345                               | 835                         | 10                   | 6                                 | 16                    |
|                        | ASA24       | 491                        | 478                               | 2615                        | 23                   | 12                                | 75                    |
|                        | FR          | 428                        | 346                               | 774                         | 2                    | 1                                 | 3                     |
| Protein                | Biospecimen | 462                        | 375                               | 837                         | 5                    | 0                                 | 5                     |
|                        | FFQ         | 493                        | 349                               | 842                         | 5                    | 4                                 | 9                     |
|                        | ASA24       | 501                        | 488                               | 2673                        | 15                   | 1                                 | 16                    |
|                        | FR          | 429                        | 347                               | 776                         | 1                    | 0                                 | 1                     |
| Sodium                 | Biospecimen | 464                        | 372                               | 836                         | 4                    | 2                                 | 6                     |
|                        | FFQ         | 493                        | 349                               | 842                         | 5                    | 4                                 | 9                     |
|                        | ASA24       | 497                        | 484                               | 2657                        | 14                   | 4                                 | 34                    |
|                        | FR          | 427                        | 347                               | 774                         | 3                    | 0                                 | 3                     |
| Potassium              | Biospecimen | 464                        | 373                               | 837                         | 5                    | 0                                 | 5                     |
|                        | FFQ         | 489                        | 345                               | 834                         | 10                   | 7                                 | 17                    |
|                        | ASA24       | 497                        | 484                               | 2651                        | 17                   | 6                                 | 39                    |
|                        | FR          | 428                        | 345                               | 773                         | 3                    | 1                                 | 4                     |
| Protein Density        | Biospecimen | 338                        | 288                               | 626                         | 4                    | 1                                 | 5                     |
|                        | FFQ         | 436                        | 325                               | 761                         | 21                   | 2                                 | 23                    |
|                        | ASA24       | 460                        | 447                               | 2428                        | 55                   | 13                                | 78                    |
|                        | FR          | 414                        | 342                               | 756                         | 4                    | 0                                 | 4                     |
| Sodium Density         | Biospecimen | 337                        | 288                               | 625                         | 1                    | 1                                 | 2                     |
|                        | FFQ         | 438                        | 324                               | 762                         | 22                   | 2                                 | 24                    |
|                        | ASA24       | 459                        | 449                               | 2451                        | 39                   | 9                                 | 55                    |
|                        | FR          | 412                        | 342                               | 754                         | 4                    | 0                                 | 4                     |
| Potassium Density      | Biospecimen | 339                        | 292                               | 631                         | 0                    | 0                                 | 0                     |
|                        | FFQ         | 434                        | 333                               | 767                         | 14                   | 3                                 | 17                    |
|                        | ASA24       | 460                        | 450                               | 2471                        | 22                   | 7                                 | 35                    |
|                        | FR          | 414                        | 341                               | 755                         | 5                    | 0                                 | 5                     |
| Sodium:Potassium Ratio | Biospecimen | 461                        | 369                               | 830                         | 1                    | 1                                 | 2                     |
|                        | FFQ         | 485                        | 340                               | 825                         | 5                    | 3                                 | 8                     |
|                        | ASA24       | 494                        | 481                               | 2626                        | 1                    | 0                                 | 1                     |
|                        | FR          | 426                        | 345                               | 771                         | 0                    | 0                                 | 0                     |

Web Table 2: IDATA Women excluded observations

| Nutrient               | Measurement | Total eligible individuals | Eligible individuals w/ 2+ admins | Total eligible observations | Excluded individuals | Excluded individuals w/ 2+ admins | Excluded observations |
|------------------------|-------------|----------------------------|-----------------------------------|-----------------------------|----------------------|-----------------------------------|-----------------------|
| Energy                 | Biospecimen | 354                        | 19                                | 373                         | 0                    | 0                                 | 0                     |
|                        | FFQ         | 517                        | 351                               | 868                         | 4                    | 0                                 | 4                     |
|                        | ASA24       | 496                        | 477                               | 2531                        | 16                   | 6                                 | 38                    |
|                        | FR          | 425                        | 333                               | 758                         | 3                    | 3                                 | 6                     |
| Protein                | Biospecimen | 461                        | 384                               | 845                         | 4                    | 3                                 | 7                     |
|                        | FFQ         | 513                        | 352                               | 865                         | 6                    | 1                                 | 7                     |
|                        | ASA24       | 500                        | 482                               | 2545                        | 21                   | 3                                 | 24                    |
|                        | FR          | 424                        | 333                               | 757                         | 4                    | 3                                 | 7                     |
| Sodium                 | Biospecimen | 463                        | 386                               | 849                         | 2                    | 1                                 | 3                     |
|                        | FFQ         | 515                        | 351                               | 866                         | 4                    | 2                                 | 6                     |
|                        | ASA24       | 497                        | 480                               | 2542                        | 12                   | 3                                 | 27                    |
|                        | FR          | 425                        | 331                               | 756                         | 6                    | 2                                 | 8                     |
| Potassium              | Biospecimen | 462                        | 386                               | 848                         | 2                    | 2                                 | 4                     |
|                        | FFQ         | 512                        | 351                               | 863                         | 6                    | 3                                 | 9                     |
|                        | ASA24       | 494                        | 476                               | 2518                        | 19                   | 8                                 | 51                    |
|                        | FR          | 427                        | 333                               | 760                         | 3                    | 1                                 | 4                     |
| Protein Density        | Biospecimen | 342                        | 289                               | 631                         | 4                    | 3                                 | 7                     |
|                        | FFQ         | 469                        | 321                               | 790                         | 30                   | 1                                 | 31                    |
|                        | ASA24       | 465                        | 449                               | 2380                        | 37                   | 3                                 | 43                    |
|                        | FR          | 411                        | 325                               | 736                         | 6                    | 0                                 | 6                     |
| Sodium Density         | Biospecimen | 347                        | 295                               | 642                         | 0                    | 0                                 | 0                     |
|                        | FFQ         | 467                        | 327                               | 794                         | 23                   | 2                                 | 25                    |
|                        | ASA24       | 463                        | 448                               | 2381                        | 34                   | 6                                 | 43                    |
|                        | FR          | 411                        | 326                               | 737                         | 3                    | 0                                 | 3                     |
| Potassium Density      | Biospecimen | 345                        | 293                               | 638                         | 0                    | 0                                 | 0                     |
|                        | FFQ         | 470                        | 349                               | 819                         | 2                    | 0                                 | 2                     |
|                        | ASA24       | 465                        | 448                               | 2397                        | 19                   | 2                                 | 26                    |
|                        | FR          | 411                        | 326                               | 737                         | 5                    | 0                                 | 5                     |
| Sodium:Potassium Ratio | Biospecimen | 461                        | 381                               | 842                         | 3                    | 0                                 | 3                     |
|                        | FFQ         | 510                        | 347                               | 857                         | 1                    | 1                                 | 2                     |
|                        | ASA24       | 493                        | 475                               | 2512                        | 0                    | 0                                 | 0                     |
|                        | FR          | 424                        | 328                               | 752                         | 1                    | 0                                 | 1                     |

Web Table 3: MLVS excluded observations

| Nutrient               | Measurement | Total eligible individuals | Eligible individuals w/ 2+ admins | Total eligible observations | Excluded individuals | Excluded individuals w/ 2+ admins | Excluded observations |
|------------------------|-------------|----------------------------|-----------------------------------|-----------------------------|----------------------|-----------------------------------|-----------------------|
| Energy                 | Biospecimen | 662                        | 100                               | 762                         | 3                    | 1                                 | 4                     |
|                        | FFQ         | 712                        | 641                               | 1353                        | 11                   | 4                                 | 15                    |
|                        | ASA24       | 638                        | 602                               | 2057                        | 9                    | 2                                 | 13                    |
|                        | FR          | 678                        | 654                               | 1332                        | 6                    | 2                                 | 8                     |
| Protein                | Biospecimen | 687                        | 667                               | 2563                        | 17                   | 5                                 | 31                    |
|                        | FFQ         | 714                        | 644                               | 1358                        | 7                    | 2                                 | 9                     |
|                        | ASA24       | 637                        | 601                               | 2054                        | 9                    | 3                                 | 16                    |
|                        | FR          | 679                        | 657                               | 1336                        | 2                    | 2                                 | 4                     |
| Sodium                 | Biospecimen | 691                        | 672                               | 2587                        | 6                    | 1                                 | 7                     |
|                        | FFQ         | 710                        | 644                               | 1354                        | 8                    | 6                                 | 14                    |
|                        | ASA24       | 638                        | 601                               | 2060                        | 7                    | 1                                 | 10                    |
|                        | FR          | 680                        | 655                               | 1335                        | 4                    | 1                                 | 5                     |
| Potassium              | Biospecimen | 689                        | 671                               | 2577                        | 13                   | 2                                 | 17                    |
|                        | FFQ         | 712                        | 641                               | 1353                        | 11                   | 4                                 | 15                    |
|                        | ASA24       | 637                        | 601                               | 2058                        | 6                    | 2                                 | 12                    |
|                        | FR          | 681                        | 658                               | 1339                        | 1                    | 0                                 | 1                     |
| Protein Density        | Biospecimen | 655                        | 646                               | 2487                        | 2                    | 0                                 | 2                     |
|                        | FFQ         | 704                        | 628                               | 1332                        | 14                   | 0                                 | 14                    |
|                        | ASA24       | 617                        | 578                               | 1976                        | 25                   | 3                                 | 28                    |
|                        | FR          | 675                        | 653                               | 1328                        | 2                    | 1                                 | 3                     |
| Sodium Density         | Biospecimen | 659                        | 651                               | 2511                        | 2                    | 0                                 | 2                     |
|                        | FFQ         | 701                        | 630                               | 1331                        | 13                   | 0                                 | 13                    |
|                        | ASA24       | 617                        | 580                               | 1986                        | 17                   | 3                                 | 22                    |
|                        | FR          | 675                        | 651                               | 1326                        | 2                    | 0                                 | 2                     |
| Potassium Density      | Biospecimen | 655                        | 646                               | 2489                        | 0                    | 0                                 | 0                     |
|                        | FFQ         | 704                        | 631                               | 1335                        | 10                   | 1                                 | 11                    |
|                        | ASA24       | 617                        | 582                               | 1988                        | 13                   | 2                                 | 16                    |
|                        | FR          | 676                        | 655                               | 1331                        | 0                    | 0                                 | 0                     |
| Sodium:Potassium Ratio | Biospecimen | 687                        | 669                               | 2562                        | 5                    | 3                                 | 12                    |
|                        | FFQ         | 705                        | 634                               | 1339                        | 6                    | 4                                 | 10                    |
|                        | ASA24       | 634                        | 597                               | 2042                        | 5                    | 3                                 | 13                    |
|                        | FR          | 680                        | 650                               | 1330                        | 4                    | 0                                 | 4                     |

Web Table 4: WLVS excluded observations

| Nutrient               | Measurement | Total eligible individuals | Eligible individuals w/ 2+ admins | Total eligible observations | Excluded individuals | Excluded individuals w/ 2+ admins | Excluded observations |
|------------------------|-------------|----------------------------|-----------------------------------|-----------------------------|----------------------|-----------------------------------|-----------------------|
| Energy                 | Biospecimen | 735                        | 84                                | 819                         | 3                    | 2                                 | 5                     |
|                        | FFQ         | 778                        | 731                               | 1509                        | 8                    | 3                                 | 11                    |
|                        | ASA24       | 684                        | 536                               | 1789                        | 18                   | 4                                 | 28                    |
|                        | FR          | 756                        | 730                               | 1486                        | 9                    | 3                                 | 12                    |
| Protein                | Biospecimen | 756                        | 748                               | 2871                        | 19                   | 6                                 | 35                    |
|                        | FFQ         | 781                        | 730                               | 1511                        | 9                    | 0                                 | 9                     |
|                        | ASA24       | 686                        | 536                               | 1792                        | 17                   | 3                                 | 23                    |
|                        | FR          | 758                        | 735                               | 1493                        | 4                    | 1                                 | 5                     |
| Sodium                 | Biospecimen | 760                        | 753                               | 2892                        | 13                   | 1                                 | 16                    |
|                        | FFQ         | 778                        | 732                               | 1510                        | 7                    | 3                                 | 10                    |
|                        | ASA24       | 686                        | 537                               | 1796                        | 21                   | 2                                 | 25                    |
|                        | FR          | 758                        | 736                               | 1494                        | 4                    | 0                                 | 4                     |
| Potassium              | Biospecimen | 761                        | 754                               | 2898                        | 10                   | 0                                 | 10                    |
|                        | FFQ         | 774                        | 727                               | 1501                        | 12                   | 7                                 | 19                    |
|                        | ASA24       | 686                        | 537                               | 1795                        | 16                   | 2                                 | 22                    |
|                        | FR          | 755                        | 729                               | 1484                        | 10                   | 4                                 | 14                    |
| Protein Density        | Biospecimen | 730                        | 727                               | 2796                        | 1                    | 0                                 | 1                     |
|                        | FFQ         | 772                        | 711                               | 1483                        | 17                   | 0                                 | 17                    |
|                        | ASA24       | 565                        | 470                               | 1567                        | 11                   | 2                                 | 14                    |
|                        | FR          | 751                        | 730                               | 1481                        | 1                    | 0                                 | 1                     |
| Sodium Density         | Biospecimen | 734                        | 732                               | 2814                        | 3                    | 0                                 | 3                     |
|                        | FFQ         | 770                        | 720                               | 1490                        | 10                   | 0                                 | 10                    |
|                        | ASA24       | 566                        | 470                               | 1566                        | 15                   | 2                                 | 18                    |
|                        | FR          | 750                        | 727                               | 1477                        | 3                    | 0                                 | 3                     |
| Potassium Density      | Biospecimen | 730                        | 727                               | 2795                        | 2                    | 0                                 | 2                     |
|                        | FFQ         | 771                        | 720                               | 1491                        | 9                    | 0                                 | 9                     |
|                        | ASA24       | 565                        | 473                               | 1573                        | 8                    | 0                                 | 8                     |
|                        | FR          | 751                        | 730                               | 1481                        | 1                    | 0                                 | 1                     |
| Sodium:Potassium Ratio | Biospecimen | 759                        | 752                               | 2880                        | 2                    | 1                                 | 5                     |
|                        | FFQ         | 768                        | 719                               | 1487                        | 6                    | 2                                 | 8                     |
|                        | ASA24       | 685                        | 535                               | 1790                        | 0                    | 0                                 | 0                     |
|                        | FR          | 753                        | 726                               | 1479                        | 1                    | 1                                 | 2                     |



**Web Table 5. Geometric means of nutrient intakes in the MEASURE<sup>1</sup> (IDATA, WLVS, and MLVS, USA, January 2011 to October 2013) studies based on the first administration of each measure, after exclusion of influential individuals and observations**

| Component        | Instrument         | Women          |         |         |                |         |         | Men            |         |         |                |         |         |
|------------------|--------------------|----------------|---------|---------|----------------|---------|---------|----------------|---------|---------|----------------|---------|---------|
|                  |                    | IDATA Women    |         |         | WLVS           |         |         | IDATA Men      |         |         | MLVS           |         |         |
|                  |                    | Geometric Mean | LCL     | UCL     |
| <b>Energy</b>    | <b>FFQ</b>         | 1491.32        | 1438.43 | 1546.15 | 1904.23        | 1864.03 | 1945.30 | 1918.06        | 1846.74 | 1992.13 | 2091.26        | 2048.20 | 2135.23 |
|                  | <b>ASA24</b>       | 1748.66        | 1690.83 | 1808.46 | 1705.92        | 1658.55 | 1754.64 | 2243.89        | 2167.30 | 2323.19 | 2236.99        | 2175.61 | 2300.11 |
|                  | <b>FR</b>          | 1727.03        | 1681.91 | 1773.35 | 1743.59        | 1718.15 | 1769.41 | 2247.68        | 2189.76 | 2307.13 | 2310.25        | 2275.25 | 2345.79 |
|                  | <b>Biospecimen</b> | 2129.04        | 2091.57 | 2167.19 | 2161.83        | 2136.88 | 2187.06 | 2749.00        | 2699.54 | 2799.37 | 2745.43        | 2714.29 | 2776.93 |
| <b>Protein</b>   | <b>FFQ</b>         | 57.28          | 55.02   | 59.63   | 82.61          | 80.75   | 84.51   | 72.75          | 69.73   | 75.90   | 84.84          | 82.93   | 86.79   |
|                  | <b>ASA24</b>       | 70.20          | 67.56   | 72.94   | 70.26          | 67.94   | 72.65   | 90.34          | 86.92   | 93.90   | 90.74          | 87.94   | 93.64   |
|                  | <b>FR</b>          | 66.83          | 65.13   | 68.58   | 71.47          | 70.28   | 72.68   | 86.99          | 84.63   | 89.41   | 94.36          | 92.66   | 96.09   |
|                  | <b>Biospecimen</b> | 75.67          | 73.15   | 78.27   | 59.14          | 57.78   | 60.53   | 104.55         | 101.19  | 108.02  | 77.71          | 75.84   | 79.62   |
| <b>Potassium</b> | <b>FFQ</b>         | 2827.56        | 2729.00 | 2929.68 | 3329.86        | 3257.29 | 3404.05 | 3327.63        | 3209.86 | 3449.72 | 3592.94        | 3514.72 | 3672.89 |
|                  | <b>ASA24</b>       | 2588.75        | 2496.75 | 2684.14 | 2574.07        | 2491.88 | 2658.96 | 3060.32        | 2951.20 | 3173.46 | 3239.68        | 3139.30 | 3343.26 |
|                  | <b>FR</b>          | 2479.49        | 2408.35 | 2552.73 | 2639.54        | 2591.99 | 2687.97 | 3006.37        | 2919.79 | 3095.53 | 3471.41        | 3405.52 | 3538.57 |
|                  | <b>Biospecimen</b> | 2727.87        | 2621.81 | 2838.22 | 2906.13        | 2833.39 | 2980.75 | 3693.93        | 3566.01 | 3826.43 | 3516.10        | 3421.73 | 3613.07 |
| <b>Sodium</b>    | <b>FFQ</b>         | 2196.60        | 2110.81 | 2285.87 | 2082.50        | 2033.50 | 2132.69 | 2888.42        | 2770.40 | 3011.47 | 2174.64        | 2120.25 | 2230.42 |
|                  | <b>ASA24</b>       | 2908.82        | 2792.69 | 3029.78 | 2827.48        | 2738.26 | 2919.61 | 3820.02        | 3673.47 | 3972.43 | 3577.21        | 3459.71 | 3698.71 |
|                  | <b>FR</b>          | 2901.27        | 2820.21 | 2984.65 | 2613.04        | 2563.86 | 2663.16 | 3792.47        | 3690.02 | 3897.77 | 3195.38        | 3125.94 | 3266.36 |
|                  | <b>Biospecimen</b> | 3236.87        | 3091.56 | 3389.00 | 3286.06        | 3197.89 | 3376.66 | 4656.32        | 4448.56 | 4873.78 | 3306.93        | 3197.64 | 3419.95 |

<sup>1</sup>Abbreviations: ASA24, Automated Self-Administered 24-hour Dietary Assessment Tool 24HR; FFQ, food frequency questionnaire; FR, food record; IDATA, Interactive Diet and Activity Tracking in AARP; MLVS, Men’s Lifestyle Validation Study; WLVS, Women’s Lifestyle Validation Study

**Web Table 6. Geometric means of nutrient densities in the MEASURE<sup>1</sup> (IDATA, WLVS, and MLVS, USA, January 2011 to October 2013) studies based on the first administration of each measure, after exclusion of influential individuals and observations**

| Component                | Instrument         | Women          |         |         |                |         |         | Men            |         |         |                |         |         |
|--------------------------|--------------------|----------------|---------|---------|----------------|---------|---------|----------------|---------|---------|----------------|---------|---------|
|                          |                    | IDATA Women    |         |         | WLVS           |         |         | IDATA Men      |         |         | MLVS           |         |         |
|                          |                    | Geometric Mean | LCL     | UCL     |
| <b>Protein density</b>   | <b>FFQ</b>         | 155.06         | 152.48  | 157.69  | 173.34         | 171.29  | 175.42  | 152.81         | 150.07  | 155.61  | 161.69         | 159.60  | 163.81  |
|                          | <b>ASA24</b>       | 160.27         | 156.03  | 164.63  | 164.80         | 160.86  | 168.85  | 160.96         | 156.85  | 165.17  | 162.09         | 158.46  | 165.81  |
|                          | <b>FR</b>          | 154.28         | 151.58  | 157.02  | 164.60         | 162.48  | 166.74  | 154.80         | 152.14  | 157.51  | 163.21         | 160.93  | 165.51  |
|                          | <b>Biospecimen</b> | 144.57         | 139.46  | 149.87  | 109.27         | 106.83  | 111.78  | 154.98         | 149.86  | 160.28  | 113.33         | 110.74  | 115.97  |
| <b>Potassium density</b> | <b>FFQ</b>         | 1907.21        | 1866.21 | 1949.10 | 1744.12        | 1724.15 | 1764.32 | 1741.40        | 1706.71 | 1776.81 | 1719.66        | 1697.02 | 1742.59 |
|                          | <b>ASA24</b>       | 1477.55        | 1436.73 | 1519.53 | 1513.54        | 1477.57 | 1550.39 | 1358.37        | 1319.77 | 1398.10 | 1453.66        | 1419.92 | 1488.20 |
|                          | <b>FR</b>          | 1435.70        | 1404.73 | 1467.35 | 1514.92        | 1491.66 | 1538.54 | 1335.15        | 1308.71 | 1362.14 | 1505.21        | 1481.81 | 1528.97 |
|                          | <b>Biospecimen</b> | 1291.78        | 1233.54 | 1352.76 | 1338.58        | 1303.02 | 1375.12 | 1336.66        | 1284.97 | 1390.43 | 1281.57        | 1246.91 | 1317.20 |
| <b>Sodium density</b>    | <b>FFQ</b>         | 1493.25        | 1469.46 | 1517.43 | 1097.10        | 1081.45 | 1112.98 | 1515.75        | 1488.65 | 1543.35 | 1039.42        | 1023.61 | 1055.46 |
|                          | <b>ASA24</b>       | 1670.21        | 1623.88 | 1717.86 | 1668.57        | 1628.98 | 1709.13 | 1694.56        | 1650.51 | 1739.78 | 1600.86        | 1564.24 | 1638.33 |
|                          | <b>FR</b>          | 1674.40        | 1641.79 | 1707.67 | 1501.79        | 1479.42 | 1524.50 | 1682.98        | 1653.17 | 1713.33 | 1383.47        | 1359.40 | 1407.97 |
|                          | <b>Biospecimen</b> | 1546.60        | 1467.20 | 1630.30 | 1516.81        | 1476.74 | 1557.97 | 1682.09        | 1600.48 | 1767.85 | 1199.04        | 1158.42 | 1241.10 |
| <b>Sodium: potassium</b> | <b>FFQ</b>         | 0.78           | 0.76    | 0.80    | 0.63           | 0.62    | 0.64    | 0.87           | 0.85    | 0.89    | 0.60           | 0.59    | 0.62    |
|                          | <b>ASA24</b>       | 1.12           | 1.08    | 1.16    | 1.10           | 1.07    | 1.14    | 1.26           | 1.21    | 1.30    | 1.11           | 1.07    | 1.14    |
|                          | <b>FR</b>          | 1.17           | 1.14    | 1.20    | 0.99           | 0.97    | 1.01    | 1.26           | 1.23    | 1.29    | 0.92           | 0.90    | 0.94    |
|                          | <b>Biospecimen</b> | 1.19           | 1.14    | 1.24    | 1.13           | 1.10    | 1.17    | 1.26           | 1.21    | 1.32    | 0.95           | 0.92    | 0.98    |

<sup>1</sup>Abbreviations: ASA24, Automated Self-Administered 24-hour Dietary Assessment Tool 24-hour recall; FFQ, food frequency questionnaire; FR, food record; IDATA, Interactive Diet and Activity Tracking in AARP; MLVS, Men's Lifestyle Validation Study; WLVS, Women's Lifestyle Validation Study

**Web Table 7. Attenuation and correlation factors<sup>1</sup> for reported intakes of energy in the MEASURE<sup>2</sup> (IDATA, WLVS, and MLVS, USA, January 2011 to October 2013) studies**

| Instrument                    | Women             |      |                   |      |                   |      |                   |      | Men               |      |                   |      |                   |      |                   |      |
|-------------------------------|-------------------|------|-------------------|------|-------------------|------|-------------------|------|-------------------|------|-------------------|------|-------------------|------|-------------------|------|
|                               | IDATA Women       |      |                   |      | WLVS              |      |                   |      | IDATA Men         |      |                   |      | MLVS              |      |                   |      |
|                               | Attenuation       |      | Correlation       |      | Attenuation       |      | Correlation       |      | Attenuation       |      | Correlation       |      | Attenuation       |      | Correlation       |      |
|                               | Est               | SE   |
| FFQ - Single                  | 0.06 <sup>3</sup> | 0.02 | 0.19 <sup>3</sup> | 0.06 | 0.06              | 0.02 | 0.13              | 0.04 | 0.10 <sup>3</sup> | 0.02 | 0.38 <sup>3</sup> | 0.12 | 0.11              | 0.02 | 0.24              | 0.04 |
| FFQ - Two                     | 0.07 <sup>3</sup> | 0.02 | 0.20 <sup>3</sup> | 0.07 | 0.07              | 0.02 | 0.14              | 0.04 | 0.11 <sup>3</sup> | 0.03 | 0.40 <sup>3</sup> | 0.12 | 0.13              | 0.02 | 0.26              | 0.04 |
| FFQ - Adjusted <sup>4</sup>   | 0.09 <sup>3</sup> | 0.03 |                   |      | 0.08              | 0.02 |                   |      | 0.13 <sup>3</sup> | 0.03 |                   |      | 0.16              | 0.03 |                   |      |
| ASA24 - Single                | 0.08 <sup>3</sup> | 0.02 | 0.22 <sup>3</sup> | 0.05 | 0.07 <sup>3</sup> | 0.01 | 0.16 <sup>3</sup> | 0.03 | 0.08 <sup>3</sup> | 0.02 | 0.30 <sup>3</sup> | 0.09 | 0.08 <sup>3</sup> | 0.01 | 0.22 <sup>3</sup> | 0.03 |
| ASA24 - Four                  | 0.15 <sup>3</sup> | 0.03 | 0.30 <sup>3</sup> | 0.06 | 0.13 <sup>3</sup> | 0.03 | 0.22 <sup>3</sup> | 0.04 | 0.16 <sup>3</sup> | 0.03 | 0.40 <sup>3</sup> | 0.12 | 0.16 <sup>3</sup> | 0.02 | 0.30 <sup>3</sup> | 0.04 |
| ASA24 - Six                   | 0.17 <sup>3</sup> | 0.03 | 0.32 <sup>3</sup> | 0.07 | 0.15 <sup>3</sup> | 0.03 | 0.23 <sup>3</sup> | 0.05 | 0.17 <sup>3</sup> | 0.03 | 0.42 <sup>3</sup> | 0.12 | 0.18 <sup>3</sup> | 0.03 | 0.31 <sup>3</sup> | 0.05 |
| ASA24 - Twelve                | 0.19 <sup>3</sup> | 0.04 | 0.34 <sup>3</sup> | 0.07 | 0.17 <sup>3</sup> | 0.04 | 0.25 <sup>3</sup> | 0.05 | 0.19 <sup>3</sup> | 0.04 | 0.45 <sup>3</sup> | 0.13 | 0.20 <sup>3</sup> | 0.03 | 0.33 <sup>3</sup> | 0.05 |
| ASA24 - Adjusted <sup>4</sup> | 0.21 <sup>3</sup> | 0.04 |                   |      | 0.20 <sup>3</sup> | 0.04 |                   |      | 0.22 <sup>3</sup> | 0.04 |                   |      | 0.23 <sup>3</sup> | 0.04 |                   |      |
| FR - Single <sup>5</sup>      | 0.14              | 0.03 | 0.28              | 0.06 | 0.29              | 0.02 | 0.42              | 0.03 | 0.14              | 0.03 | 0.37              | 0.11 | 0.33              | 0.02 | 0.52              | 0.03 |
| FR - Two <sup>5</sup>         | 0.19              | 0.04 | 0.32              | 0.07 | 0.35              | 0.03 | 0.46              | 0.03 | 0.19              | 0.04 | 0.42              | 0.13 | 0.39              | 0.03 | 0.56              | 0.03 |
| FR - Adjusted <sup>4,5</sup>  | 0.29              | 0.06 |                   |      | 0.43              | 0.04 |                   |      | 0.26              | 0.06 |                   |      | 0.46              | 0.03 |                   |      |

<sup>1</sup>Attenuation and correlation factors were estimated using a measurement error model.

<sup>2</sup>Abbreviations: ASA24, Automated Self-Administered 24-hour Dietary Assessment Tool 24-hour recall; FFQ, food frequency questionnaire; FR, food record; IDATA, Interactive Diet and Activity Tracking in AARP; MLVS, Men's Lifestyle Validation Study; WLVS, Women's Lifestyle Validation Study

<sup>3</sup>Self-reported intakes were collected using online (versus paper-based) instruments.

<sup>4</sup>Refers to attenuation factors that would pertain if repeat self-report administrations were adjusted for random error using regression calibration.

<sup>5</sup>The FR was weighed in WLVS and MLVS and unweighed in IDATA.

**Web Table 8. Attenuation and correlation factors<sup>1</sup> for reported intakes of protein and protein density in the MEASURE<sup>2</sup> (IDATA, WLVS, and MLVS, USA, January 2011 to October 2013) studies**

| Component                    | Instrument                    | Women             |      |                   |      |                   |      |                   |      | Men               |      |                   |      |                   |      |                   |      |
|------------------------------|-------------------------------|-------------------|------|-------------------|------|-------------------|------|-------------------|------|-------------------|------|-------------------|------|-------------------|------|-------------------|------|
|                              |                               | IDATA Women       |      |                   |      | WLVS              |      |                   |      | IDATA Men         |      |                   |      | MLVS              |      |                   |      |
|                              |                               | Attenuation       |      | Correlation       |      | Attenuation       |      | Correlation       |      | Attenuation       |      | Correlation       |      | Attenuation       |      | Correlation       |      |
| Est                          | SE                            | Est               | SE   | Est               | SE   | Est               | SE   | Est               | SE   | Est               | SE   | Est               | SE   | Est               | SE   |                   |      |
| <b>Protein</b>               | FFQ - Single                  | 0.17 <sup>3</sup> | 0.03 | 0.30 <sup>3</sup> | 0.05 | 0.26              | 0.03 | 0.33              | 0.04 | 0.21 <sup>3</sup> | 0.03 | 0.35 <sup>3</sup> | 0.05 | 0.27              | 0.03 | 0.33              | 0.04 |
|                              | FFQ - Two                     | 0.21 <sup>3</sup> | 0.04 | 0.33 <sup>3</sup> | 0.05 | 0.31              | 0.03 | 0.36              | 0.04 | 0.24 <sup>3</sup> | 0.03 | 0.38 <sup>3</sup> | 0.05 | 0.33              | 0.04 | 0.36              | 0.04 |
|                              | FFQ - Adjusted <sup>4</sup>   | 0.26 <sup>3</sup> | 0.04 |                   |      | 0.38              | 0.04 |                   |      | 0.28 <sup>3</sup> | 0.04 |                   |      | 0.41              | 0.05 |                   |      |
|                              | ASA24 - Single                | 0.19 <sup>3</sup> | 0.02 | 0.31 <sup>3</sup> | 0.03 | 0.22 <sup>3</sup> | 0.02 | 0.34 <sup>3</sup> | 0.03 | 0.22 <sup>3</sup> | 0.02 | 0.35 <sup>3</sup> | 0.03 | 0.20 <sup>3</sup> | 0.02 | 0.31 <sup>3</sup> | 0.03 |
|                              | ASA24 - Four                  | 0.39 <sup>3</sup> | 0.04 | 0.45 <sup>3</sup> | 0.05 | 0.48 <sup>3</sup> | 0.04 | 0.51 <sup>3</sup> | 0.04 | 0.47 <sup>3</sup> | 0.04 | 0.51 <sup>3</sup> | 0.04 | 0.43 <sup>3</sup> | 0.04 | 0.45 <sup>3</sup> | 0.04 |
|                              | ASA24 - Six                   | 0.45 <sup>3</sup> | 0.05 | 0.48 <sup>3</sup> | 0.05 | 0.56 <sup>3</sup> | 0.05 | 0.54 <sup>3</sup> | 0.04 | 0.54 <sup>3</sup> | 0.05 | 0.55 <sup>3</sup> | 0.04 | 0.49 <sup>3</sup> | 0.05 | 0.49 <sup>3</sup> | 0.04 |
|                              | ASA24 - Twelve                | 0.53 <sup>3</sup> | 0.06 | 0.52 <sup>3</sup> | 0.05 | 0.66 <sup>3</sup> | 0.06 | 0.59 <sup>3</sup> | 0.05 | 0.63 <sup>3</sup> | 0.06 | 0.59 <sup>3</sup> | 0.04 | 0.58 <sup>3</sup> | 0.06 | 0.53 <sup>3</sup> | 0.05 |
|                              | ASA24 - Adjusted <sup>4</sup> | 0.63 <sup>3</sup> | 0.07 |                   |      | 0.80 <sup>3</sup> | 0.09 |                   |      | 0.76 <sup>3</sup> | 0.07 |                   |      | 0.70 <sup>3</sup> | 0.08 |                   |      |
|                              | FR - Single <sup>5</sup>      | 0.42              | 0.05 | 0.43              | 0.05 | 0.68              | 0.04 | 0.64              | 0.03 | 0.44              | 0.04 | 0.46              | 0.04 | 0.72              | 0.04 | 0.67              | 0.03 |
|                              | FR - Two <sup>5</sup>         | 0.55              | 0.06 | 0.49              | 0.05 | 0.82              | 0.04 | 0.70              | 0.03 | 0.56              | 0.06 | 0.52              | 0.04 | 0.83              | 0.04 | 0.72              | 0.03 |
| FR – Adjusted <sup>4,5</sup> | 0.77                          | 0.09              |      |                   | 1.01 | 0.05              |      |                   | 0.75 | 0.08              |      |                   | 0.98 | 0.05              |      |                   |      |
| <b>Protein Density</b>       | FFQ - Single                  | 0.34 <sup>3</sup> | 0.06 | 0.32 <sup>3</sup> | 0.05 | 0.29              | 0.04 | 0.26              | 0.03 | 0.23 <sup>3</sup> | 0.06 | 0.24 <sup>3</sup> | 0.06 | 0.35              | 0.04 | 0.32              | 0.04 |
|                              | FFQ - Two                     | 0.57 <sup>3</sup> | 0.09 | 0.41 <sup>3</sup> | 0.06 | 0.43              | 0.06 | 0.31              | 0.04 | 0.33 <sup>3</sup> | 0.08 | 0.28 <sup>3</sup> | 0.07 | 0.49              | 0.06 | 0.39              | 0.04 |
|                              | FFQ - Adjusted <sup>4</sup>   | 1.76 <sup>3</sup> | 0.49 |                   |      | 0.80              | 0.12 |                   |      | 0.62 <sup>3</sup> | 0.16 |                   |      | 0.84              | 0.11 |                   |      |
|                              | ASA24 - Single                | 0.08 <sup>3</sup> | 0.03 | 0.14 <sup>3</sup> | 0.04 | 0.13 <sup>3</sup> | 0.02 | 0.22 <sup>3</sup> | 0.04 | 0.11 <sup>3</sup> | 0.03 | 0.19 <sup>3</sup> | 0.04 | 0.10 <sup>3</sup> | 0.02 | 0.17 <sup>3</sup> | 0.03 |
|                              | ASA24 - Four                  | 0.17 <sup>3</sup> | 0.05 | 0.19 <sup>3</sup> | 0.06 | 0.27 <sup>3</sup> | 0.05 | 0.31 <sup>3</sup> | 0.05 | 0.22 <sup>3</sup> | 0.05 | 0.26 <sup>3</sup> | 0.06 | 0.20 <sup>3</sup> | 0.04 | 0.24 <sup>3</sup> | 0.05 |
|                              | ASA24 - Six                   | 0.19 <sup>3</sup> | 0.06 | 0.21 <sup>3</sup> | 0.06 | 0.30 <sup>3</sup> | 0.05 | 0.33 <sup>3</sup> | 0.06 | 0.24 <sup>3</sup> | 0.06 | 0.28 <sup>3</sup> | 0.06 | 0.23 <sup>3</sup> | 0.05 | 0.26 <sup>3</sup> | 0.05 |
|                              | ASA24 - Twelve                | 0.22 <sup>3</sup> | 0.07 | 0.22 <sup>3</sup> | 0.07 | 0.35 <sup>3</sup> | 0.06 | 0.35 <sup>3</sup> | 0.06 | 0.27 <sup>3</sup> | 0.06 | 0.30 <sup>3</sup> | 0.07 | 0.26 <sup>3</sup> | 0.05 | 0.28 <sup>3</sup> | 0.05 |
|                              | ASA24 - Adjusted <sup>4</sup> | 0.25 <sup>3</sup> | 0.08 |                   |      | 0.41 <sup>3</sup> | 0.07 |                   |      | 0.31 <sup>3</sup> | 0.07 |                   |      | 0.30 <sup>3</sup> | 0.06 |                   |      |
|                              | FR - Single <sup>5</sup>      | 0.39              | 0.07 | 0.35              | 0.06 | 0.57              | 0.04 | 0.50              | 0.03 | 0.32              | 0.06 | 0.31              | 0.05 | 0.56              | 0.04 | 0.49              | 0.03 |
|                              | FR - Two <sup>5</sup>         | 0.54              | 0.09 | 0.41              | 0.06 | 0.72              | 0.05 | 0.56              | 0.03 | 0.45              | 0.08 | 0.36              | 0.06 | 0.69              | 0.05 | 0.54              | 0.04 |
| FR – Adjusted <sup>4,5</sup> | 0.85                          | 0.15              |      |                   | 0.99 | 0.08              |      |                   | 0.76 | 0.15              |      |                   | 0.90 | 0.07              |      |                   |      |

<sup>1</sup>Attenuation and correlation factors were estimated using a measurement error model.

<sup>2</sup>Abbreviations: ASA24, Automated Self-Administered 24-hour Dietary Assessment Tool 24-hour recall; FFQ, food frequency questionnaire; FR, food record; IDATA, Interactive Diet and Activity Tracking in AARP; MLVS, Men's Lifestyle Validation Study; WLVS, Women's Lifestyle Validation Study

<sup>3</sup>Self-reported intakes were collected using online (versus paper-based) instruments.

<sup>4</sup>Refers to attenuation factors that would pertain if repeat self-report administrations were adjusted for random error using regression calibration.

<sup>5</sup>The FR was weighed in WLVS and MLVS and unweighed in IDATA.

**Web Table 9. Attenuation and correlation factors<sup>1</sup> for reported intakes of potassium and potassium density in the MEASURE<sup>2</sup> (IDATA, WLVS, and MLVS, USA, January 2011 to October 2013) studies**

| Component                    | Instrument                    | Women             |      |                   |      |                   |      |                   |      | Men               |      |                   |      |                   |      |                   |      |
|------------------------------|-------------------------------|-------------------|------|-------------------|------|-------------------|------|-------------------|------|-------------------|------|-------------------|------|-------------------|------|-------------------|------|
|                              |                               | IDATA Women       |      |                   |      | WLVS              |      |                   |      | IDATA Men         |      |                   |      | MLVS              |      |                   |      |
|                              |                               | Attenuation       |      | Correlation       |      | Attenuation       |      | Correlation       |      | Attenuation       |      | Correlation       |      | Attenuation       |      | Correlation       |      |
| Est                          | SE                            | Est               | SE   | Est               | SE   | Est               | SE   | Est               | SE   | Est               | SE   | Est               | SE   | Est               | SE   |                   |      |
| <b>Potassium</b>             | FFQ - Single                  | 0.26 <sup>3</sup> | 0.04 | 0.33 <sup>3</sup> | 0.05 | 0.32              | 0.03 | 0.41              | 0.04 | 0.26 <sup>3</sup> | 0.04 | 0.36 <sup>3</sup> | 0.05 | 0.43              | 0.04 | 0.49              | 0.04 |
|                              | FFQ - Two                     | 0.30 <sup>3</sup> | 0.05 | 0.36 <sup>3</sup> | 0.05 | 0.36              | 0.04 | 0.43              | 0.04 | 0.29 <sup>3</sup> | 0.04 | 0.38 <sup>3</sup> | 0.05 | 0.48              | 0.04 | 0.53              | 0.04 |
|                              | FFQ - Adjusted <sup>4</sup>   | 0.36 <sup>3</sup> | 0.06 |                   |      | 0.42              | 0.04 |                   |      | 0.33 <sup>3</sup> | 0.05 |                   |      | 0.55              | 0.05 |                   |      |
|                              | ASA24 - Single                | 0.31 <sup>3</sup> | 0.03 | 0.40 <sup>3</sup> | 0.04 | 0.28 <sup>3</sup> | 0.02 | 0.45 <sup>3</sup> | 0.03 | 0.30 <sup>3</sup> | 0.03 | 0.44 <sup>3</sup> | 0.03 | 0.29 <sup>3</sup> | 0.02 | 0.43 <sup>3</sup> | 0.03 |
|                              | ASA24 - Four                  | 0.55 <sup>3</sup> | 0.05 | 0.54 <sup>3</sup> | 0.04 | 0.51 <sup>3</sup> | 0.04 | 0.61 <sup>3</sup> | 0.04 | 0.55 <sup>3</sup> | 0.04 | 0.60 <sup>3</sup> | 0.04 | 0.51 <sup>3</sup> | 0.04 | 0.57 <sup>3</sup> | 0.04 |
|                              | ASA24 - Six                   | 0.60 <sup>3</sup> | 0.06 | 0.56 <sup>3</sup> | 0.05 | 0.56 <sup>3</sup> | 0.04 | 0.64 <sup>3</sup> | 0.04 | 0.60 <sup>3</sup> | 0.05 | 0.62 <sup>3</sup> | 0.04 | 0.56 <sup>3</sup> | 0.04 | 0.59 <sup>3</sup> | 0.04 |
|                              | ASA24 - Twelve                | 0.66 <sup>3</sup> | 0.06 | 0.59 <sup>3</sup> | 0.05 | 0.62 <sup>3</sup> | 0.05 | 0.67 <sup>3</sup> | 0.04 | 0.67 <sup>3</sup> | 0.05 | 0.66 <sup>3</sup> | 0.04 | 0.61 <sup>3</sup> | 0.05 | 0.62 <sup>3</sup> | 0.04 |
|                              | ASA24 - Adjusted <sup>4</sup> | 0.74 <sup>3</sup> | 0.07 |                   |      | 0.70 <sup>3</sup> | 0.06 |                   |      | 0.75 <sup>3</sup> | 0.06 |                   |      | 0.68 <sup>3</sup> | 0.06 |                   |      |
|                              | FR - Single <sup>5</sup>      | 0.53              | 0.05 | 0.51              | 0.04 | 0.69              | 0.03 | 0.74              | 0.03 | 0.50              | 0.04 | 0.55              | 0.04 | 0.68              | 0.04 | 0.67              | 0.03 |
|                              | FR - Two <sup>5</sup>         | 0.66              | 0.06 | 0.56              | 0.05 | 0.77              | 0.04 | 0.79              | 0.03 | 0.61              | 0.05 | 0.61              | 0.04 | 0.76              | 0.04 | 0.71              | 0.03 |
| FR – Adjusted <sup>4,5</sup> | 0.86                          | 0.09              |      |                   | 0.88 | 0.04              |      |                   | 0.77 | 0.07              |      |                   | 0.86 | 0.05              |      |                   |      |
| <b>Potassium Density</b>     | FFQ - Single                  | 0.45 <sup>3</sup> | 0.07 | 0.40 <sup>3</sup> | 0.05 | 0.40              | 0.05 | 0.32              | 0.04 | 0.36 <sup>3</sup> | 0.07 | 0.33 <sup>3</sup> | 0.06 | 0.45              | 0.05 | 0.39              | 0.04 |
|                              | FFQ - Two                     | 0.59 <sup>3</sup> | 0.08 | 0.46 <sup>3</sup> | 0.06 | 0.55              | 0.06 | 0.37              | 0.04 | 0.46 <sup>3</sup> | 0.08 | 0.37 <sup>3</sup> | 0.06 | 0.58              | 0.06 | 0.44              | 0.04 |
|                              | FFQ - Adjusted <sup>4</sup>   | 0.84 <sup>3</sup> | 0.13 |                   |      | 0.86              | 0.11 |                   |      | 0.64 <sup>3</sup> | 0.12 |                   |      | 0.79              | 0.09 |                   |      |
|                              | ASA24 - Single                | 0.19 <sup>3</sup> | 0.04 | 0.24 <sup>3</sup> | 0.05 | 0.23 <sup>3</sup> | 0.03 | 0.33 <sup>3</sup> | 0.04 | 0.15 <sup>3</sup> | 0.03 | 0.22 <sup>3</sup> | 0.05 | 0.21 <sup>3</sup> | 0.03 | 0.31 <sup>3</sup> | 0.04 |
|                              | ASA24 - Four                  | 0.31 <sup>3</sup> | 0.06 | 0.31 <sup>3</sup> | 0.06 | 0.39 <sup>3</sup> | 0.05 | 0.43 <sup>3</sup> | 0.05 | 0.24 <sup>3</sup> | 0.05 | 0.28 <sup>3</sup> | 0.06 | 0.34 <sup>3</sup> | 0.04 | 0.40 <sup>3</sup> | 0.04 |
|                              | ASA24 - Six                   | 0.33 <sup>3</sup> | 0.07 | 0.32 <sup>3</sup> | 0.06 | 0.43 <sup>3</sup> | 0.05 | 0.45 <sup>3</sup> | 0.05 | 0.25 <sup>3</sup> | 0.06 | 0.29 <sup>3</sup> | 0.07 | 0.36 <sup>3</sup> | 0.04 | 0.41 <sup>3</sup> | 0.05 |
|                              | ASA24 - Twelve                | 0.36 <sup>3</sup> | 0.07 | 0.33 <sup>3</sup> | 0.07 | 0.47 <sup>3</sup> | 0.06 | 0.47 <sup>3</sup> | 0.05 | 0.28 <sup>3</sup> | 0.06 | 0.31 <sup>3</sup> | 0.07 | 0.39 <sup>3</sup> | 0.05 | 0.43 <sup>3</sup> | 0.05 |
|                              | ASA24 - Adjusted <sup>4</sup> | 0.39 <sup>3</sup> | 0.08 |                   |      | 0.52 <sup>3</sup> | 0.06 |                   |      | 0.30 <sup>3</sup> | 0.07 |                   |      | 0.43 <sup>3</sup> | 0.05 |                   |      |
|                              | FR - Single <sup>5</sup>      | 0.62              | 0.07 | 0.49              | 0.05 | 0.68              | 0.04 | 0.62              | 0.03 | 0.43              | 0.06 | 0.37              | 0.05 | 0.64              | 0.04 | 0.58              | 0.03 |
|                              | FR - Two <sup>5</sup>         | 0.79              | 0.09 | 0.55              | 0.06 | 0.79              | 0.04 | 0.67              | 0.03 | 0.57              | 0.08 | 0.43              | 0.06 | 0.73              | 0.05 | 0.62              | 0.03 |
| FR – Adjusted <sup>4,5</sup> | 1.10                          | 0.14              |      |                   | 0.93 | 0.05              |      |                   | 0.85 | 0.14              |      |                   | 0.86 | 0.06              |      |                   |      |

<sup>1</sup>Attenuation and correlation factors were estimated using a measurement error model.

<sup>2</sup>Abbreviations: ASA24, Automated Self-Administered 24-hour Dietary Assessment Tool 24-hour recall; FFQ, food frequency questionnaire; FR, food record; IDATA, Interactive Diet and Activity Tracking in AARP; MLVS, Men's Lifestyle Validation Study; WLVS, Women's Lifestyle Validation Study

<sup>3</sup>Self-reported intakes were collected using online (versus paper-based) instruments.

<sup>4</sup>Refers to attenuation factors that would pertain if repeat self-report administrations were adjusted for random error using regression calibration.

<sup>5</sup>The FR was weighed in WLVS and MLVS and unweighed in IDATA.

**Web Table 10. Attenuation and correlation factors<sup>1</sup> for reported intakes of sodium and sodium density in the MEASURE<sup>2</sup> (IDATA, WLVS, and MLVS, USA, January 2011 to October 2013) studies**

| Component                    | Instrument                    | Women             |      |                   |      |                   |      |                   |      | Men               |      |                   |      |                   |      |                   |      |
|------------------------------|-------------------------------|-------------------|------|-------------------|------|-------------------|------|-------------------|------|-------------------|------|-------------------|------|-------------------|------|-------------------|------|
|                              |                               | IDATA Women       |      |                   |      | WLVS              |      |                   |      | IDATA Men         |      |                   |      | MLVS              |      |                   |      |
|                              |                               | Attenuation       |      | Correlation       |      | Attenuation       |      | Correlation       |      | Attenuation       |      | Correlation       |      | Attenuation       |      | Correlation       |      |
| Est                          | SE                            | Est               | SE   | Est               | SE   | Est               | SE   | Est               | SE   | Est               | SE   | Est               | SE   | Est               | SE   |                   |      |
| <b>Sodium</b>                | FFQ - Single                  | 0.15 <sup>3</sup> | 0.04 | 0.23 <sup>3</sup> | 0.06 | 0.15              | 0.03 | 0.23              | 0.05 | 0.17 <sup>3</sup> | 0.04 | 0.24 <sup>3</sup> | 0.06 | 0.20              | 0.04 | 0.26              | 0.05 |
|                              | FFQ - Two                     | 0.17 <sup>3</sup> | 0.05 | 0.24 <sup>3</sup> | 0.07 | 0.17              | 0.04 | 0.24              | 0.05 | 0.19 <sup>3</sup> | 0.05 | 0.26 <sup>3</sup> | 0.06 | 0.23              | 0.04 | 0.28              | 0.05 |
|                              | FFQ - Adjusted <sup>4</sup>   | 0.21 <sup>3</sup> | 0.06 |                   |      | 0.20              | 0.04 |                   |      | 0.23 <sup>3</sup> | 0.06 |                   |      | 0.28              | 0.05 |                   |      |
|                              | ASA24 - Single                | 0.19 <sup>3</sup> | 0.03 | 0.28 <sup>3</sup> | 0.04 | 0.17 <sup>3</sup> | 0.02 | 0.29 <sup>3</sup> | 0.04 | 0.21 <sup>3</sup> | 0.03 | 0.29 <sup>3</sup> | 0.04 | 0.21 <sup>3</sup> | 0.03 | 0.31 <sup>3</sup> | 0.04 |
|                              | ASA24 - Four                  | 0.40 <sup>3</sup> | 0.06 | 0.41 <sup>3</sup> | 0.06 | 0.36 <sup>3</sup> | 0.05 | 0.43 <sup>3</sup> | 0.06 | 0.43 <sup>3</sup> | 0.06 | 0.41 <sup>3</sup> | 0.05 | 0.44 <sup>3</sup> | 0.05 | 0.46 <sup>3</sup> | 0.05 |
|                              | ASA24 - Six                   | 0.45 <sup>3</sup> | 0.07 | 0.43 <sup>3</sup> | 0.06 | 0.41 <sup>3</sup> | 0.06 | 0.46 <sup>3</sup> | 0.06 | 0.49 <sup>3</sup> | 0.07 | 0.43 <sup>3</sup> | 0.05 | 0.51 <sup>3</sup> | 0.06 | 0.49 <sup>3</sup> | 0.05 |
|                              | ASA24 - Twelve                | 0.53 <sup>3</sup> | 0.08 | 0.47 <sup>3</sup> | 0.07 | 0.48 <sup>3</sup> | 0.07 | 0.50 <sup>3</sup> | 0.07 | 0.56 <sup>3</sup> | 0.08 | 0.47 <sup>3</sup> | 0.06 | 0.59 <sup>3</sup> | 0.07 | 0.53 <sup>3</sup> | 0.06 |
|                              | ASA24 - Adjusted <sup>4</sup> | 0.63 <sup>3</sup> | 0.10 |                   |      | 0.59 <sup>3</sup> | 0.09 |                   |      | 0.66 <sup>3</sup> | 0.09 |                   |      | 0.71 <sup>3</sup> | 0.09 |                   |      |
|                              | FR - Single <sup>5</sup>      | 0.35              | 0.06 | 0.35              | 0.06 | 0.50              | 0.04 | 0.58              | 0.04 | 0.46              | 0.06 | 0.41              | 0.05 | 0.49              | 0.04 | 0.55              | 0.04 |
|                              | FR - Two <sup>5</sup>         | 0.47              | 0.08 | 0.40              | 0.07 | 0.64              | 0.05 | 0.66              | 0.05 | 0.62              | 0.08 | 0.47              | 0.06 | 0.58              | 0.05 | 0.60              | 0.04 |
| FR – Adjusted <sup>4,5</sup> | 0.72                          | 0.13              |      |                   | 0.88 | 0.07              |      |                   | 0.98 | 0.14              |      |                   | 0.72 | 0.06              |      |                   |      |
| <b>Sodium Density</b>        | FFQ - Single                  | 0.34 <sup>3</sup> | 0.08 | 0.29 <sup>3</sup> | 0.07 | 0.25              | 0.04 | 0.30              | 0.05 | 0.27 <sup>3</sup> | 0.08 | 0.22 <sup>3</sup> | 0.06 | 0.30              | 0.05 | 0.28              | 0.04 |
|                              | FFQ - Two                     | 0.55 <sup>3</sup> | 0.13 | 0.36 <sup>3</sup> | 0.08 | 0.33              | 0.05 | 0.34              | 0.06 | 0.39 <sup>3</sup> | 0.12 | 0.26 <sup>3</sup> | 0.08 | 0.40              | 0.07 | 0.32              | 0.05 |
|                              | FFQ - Adjusted <sup>4</sup>   | 1.35 <sup>3</sup> | 0.37 |                   |      | 0.49              | 0.08 |                   |      | 0.70 <sup>3</sup> | 0.22 |                   |      | 0.60              | 0.10 |                   |      |
|                              | ASA24 - Single                | 0.11 <sup>3</sup> | 0.04 | 0.17 <sup>3</sup> | 0.06 | 0.11 <sup>3</sup> | 0.03 | 0.21 <sup>3</sup> | 0.05 | 0.09 <sup>3</sup> | 0.04 | 0.12 <sup>3</sup> | 0.05 | 0.17 <sup>3</sup> | 0.03 | 0.25 <sup>3</sup> | 0.04 |
|                              | ASA24 - Four                  | 0.23 <sup>3</sup> | 0.08 | 0.24 <sup>3</sup> | 0.08 | 0.22 <sup>3</sup> | 0.05 | 0.30 <sup>3</sup> | 0.07 | 0.16 <sup>3</sup> | 0.07 | 0.16 <sup>3</sup> | 0.07 | 0.34 <sup>3</sup> | 0.05 | 0.35 <sup>3</sup> | 0.05 |
|                              | ASA24 - Six                   | 0.26 <sup>3</sup> | 0.09 | 0.26 <sup>3</sup> | 0.08 | 0.25 <sup>3</sup> | 0.06 | 0.32 <sup>3</sup> | 0.07 | 0.18 <sup>3</sup> | 0.07 | 0.17 <sup>3</sup> | 0.07 | 0.38 <sup>3</sup> | 0.06 | 0.37 <sup>3</sup> | 0.06 |
|                              | ASA24 - Twelve                | 0.31 <sup>3</sup> | 0.10 | 0.28 <sup>3</sup> | 0.09 | 0.29 <sup>3</sup> | 0.07 | 0.34 <sup>3</sup> | 0.08 | 0.20 <sup>3</sup> | 0.08 | 0.18 <sup>3</sup> | 0.08 | 0.44 <sup>3</sup> | 0.07 | 0.40 <sup>3</sup> | 0.06 |
|                              | ASA24 - Adjusted <sup>4</sup> | 0.36 <sup>3</sup> | 0.12 |                   |      | 0.34 <sup>3</sup> | 0.08 |                   |      | 0.23 <sup>3</sup> | 0.10 |                   |      | 0.51 <sup>3</sup> | 0.08 |                   |      |
|                              | FR - Single <sup>5</sup>      | 0.34              | 0.08 | 0.31              | 0.07 | 0.45              | 0.04 | 0.51              | 0.05 | 0.25              | 0.08 | 0.19              | 0.06 | 0.58              | 0.05 | 0.54              | 0.04 |
|                              | FR - Two <sup>5</sup>         | 0.49              | 0.11 | 0.37              | 0.08 | 0.61              | 0.06 | 0.59              | 0.05 | 0.39              | 0.13 | 0.24              | 0.07 | 0.73              | 0.06 | 0.61              | 0.04 |
| FR – Adjusted <sup>4,5</sup> | 0.85                          | 0.21              |      |                   | 0.98 | 0.10              |      |                   | 0.94 | 0.34              |      |                   | 0.99 | 0.08              |      |                   |      |

<sup>1</sup>Attenuation and correlation factors were estimated using a measurement error model.

<sup>2</sup>Abbreviations: ASA24, Automated Self-Administered 24-hour Dietary Assessment Tool 24-hour recall; FFQ, food frequency questionnaire; FR, food record; IDATA, Interactive Diet and Activity Tracking in AARP; MLVS, Men's Lifestyle Validation Study; WLVS, Women's Lifestyle Validation Study

<sup>3</sup>Self-reported intakes were collected using online (versus paper-based) instruments.

<sup>4</sup>Refers to attenuation factors that would pertain if repeat self-report administrations were adjusted for random error using regression calibration.

<sup>5</sup>The FR was weighed in WLVS and MLVS and unweighed in IDATA.

**Web Table 11. Attenuation and correlation factors<sup>1</sup> for reported intakes of sodium:potassium in the MEASURE<sup>2</sup> (IDATA, WLVS, and MLVS, USA, January 2011 to October 2013) studies**

| Instrument                    | Women             |      |                   |      |                   |      |                   |      | Men               |      |                   |      |                   |      |                   |      |
|-------------------------------|-------------------|------|-------------------|------|-------------------|------|-------------------|------|-------------------|------|-------------------|------|-------------------|------|-------------------|------|
|                               | IDATA Women       |      |                   |      | WLVS              |      |                   |      | IDATA Men         |      |                   |      | MLVS              |      |                   |      |
|                               | Attenuation       |      | Correlation       |      | Attenuation       |      | Correlation       |      | Attenuation       |      | Correlation       |      | Attenuation       |      | Correlation       |      |
|                               | Est               | SE   |
| FFQ - Single                  | 0.55 <sup>3</sup> | 0.06 | 0.50 <sup>3</sup> | 0.05 | 0.71              | 0.05 | 0.55              | 0.03 | 0.56 <sup>3</sup> | 0.06 | 0.51 <sup>3</sup> | 0.05 | 0.65              | 0.05 | 0.52              | 0.03 |
| FFQ - Two                     | 0.64 <sup>3</sup> | 0.07 | 0.54 <sup>3</sup> | 0.05 | 0.83              | 0.06 | 0.59              | 0.03 | 0.64 <sup>3</sup> | 0.07 | 0.54 <sup>3</sup> | 0.05 | 0.76              | 0.06 | 0.56              | 0.04 |
| FFQ - Adjusted <sup>4</sup>   | 0.74 <sup>3</sup> | 0.08 |                   |      | 0.98              | 0.07 |                   |      | 0.73 <sup>3</sup> | 0.08 |                   |      | 0.90              | 0.07 |                   |      |
| ASA24 - Single                | 0.33 <sup>3</sup> | 0.03 | 0.42 <sup>3</sup> | 0.03 | 0.33 <sup>3</sup> | 0.03 | 0.41 <sup>3</sup> | 0.03 | 0.33 <sup>3</sup> | 0.03 | 0.40 <sup>3</sup> | 0.03 | 0.43 <sup>3</sup> | 0.03 | 0.50 <sup>3</sup> | 0.03 |
| ASA24 - Four                  | 0.72 <sup>3</sup> | 0.06 | 0.62 <sup>3</sup> | 0.05 | 0.73 <sup>3</sup> | 0.06 | 0.60 <sup>3</sup> | 0.04 | 0.72 <sup>3</sup> | 0.06 | 0.59 <sup>3</sup> | 0.04 | 0.82 <sup>3</sup> | 0.05 | 0.69 <sup>3</sup> | 0.03 |
| ASA24 - Six                   | 0.83 <sup>3</sup> | 0.07 | 0.66 <sup>3</sup> | 0.05 | 0.83 <sup>3</sup> | 0.07 | 0.65 <sup>3</sup> | 0.04 | 0.84 <sup>3</sup> | 0.07 | 0.64 <sup>3</sup> | 0.04 | 0.92 <sup>3</sup> | 0.06 | 0.73 <sup>3</sup> | 0.03 |
| ASA24 - Twelve                | 0.97 <sup>3</sup> | 0.08 | 0.72 <sup>3</sup> | 0.05 | 0.98 <sup>3</sup> | 0.08 | 0.70 <sup>3</sup> | 0.05 | 1.00 <sup>3</sup> | 0.08 | 0.69 <sup>3</sup> | 0.05 | 1.03 <sup>3</sup> | 0.07 | 0.77 <sup>3</sup> | 0.04 |
| ASA24 - Adjusted <sup>4</sup> | 1.18 <sup>3</sup> | 0.11 |                   |      | 1.19 <sup>3</sup> | 0.12 |                   |      | 1.23 <sup>3</sup> | 0.11 |                   |      | 1.18 <sup>3</sup> | 0.08 |                   |      |
| FR - Single <sup>5</sup>      | 0.65              | 0.06 | 0.58              | 0.04 | 0.74              | 0.04 | 0.69              | 0.03 | 0.75              | 0.05 | 0.64              | 0.04 | 0.70              | 0.03 | 0.70              | 0.03 |
| FR - Two <sup>5</sup>         | 0.85              | 0.07 | 0.67              | 0.05 | 0.90              | 0.04 | 0.76              | 0.03 | 0.95              | 0.07 | 0.72              | 0.04 | 0.82              | 0.04 | 0.76              | 0.03 |
| FR – Adjusted <sup>4,5</sup>  | 1.21              | 0.12 |                   |      | 1.14              | 0.06 |                   |      | 1.32              | 0.11 |                   |      | 0.99              | 0.05 |                   |      |

<sup>1</sup>Attenuation and correlation factors were estimated using a measurement error model.

<sup>2</sup>Abbreviations: ASA24, Automated Self-Administered 24-hour Dietary Assessment Tool 24-hour recall; FFQ, food frequency questionnaire; FR, food record; IDATA, Interactive Diet and Activity Tracking in AARP; MLVS, Men’s Lifestyle Validation Study; WLVS, Women’s Lifestyle Validation Study

<sup>3</sup>Self-reported intakes were collected using online (versus paper-based) instruments.

<sup>4</sup>Refers to attenuation factors that would pertain if repeat self-report administrations were adjusted for random error using regression calibration.

<sup>5</sup>The FR was weighed in WLVS and MLVS and unweighed in IDATA.

## REFERENCE

1. Kipnis V, Subar AF, Midthune D, et al. Structure of dietary measurement error: Results of the OPEN biomarker study. *Am J Epidemiol.* 2003;158(1):14-21.
